# Supplementary material for: Knowledge, Attitudes, and Awareness of New Jersey Public High School Students about Concepts of Climate Change, including Environmental Justice
Source: MDPI journal article supplement (doi:10.3390/ijerph20031922), 2023-01-20
Supplement: s1 [file s1]

## Supplementary Materials:

**Figures S1-S5.** 2021-2022 module knowledge checks questions and answers for modules 1-5, respectively.

*Figure S1. Knowledge Check 1 (with correct answers)*

4/11/22, 7:24 PM Knowledge Check 1

### Knowledge Check 1

Feel free to reference resources given in this first module. If you struggle to answer these questions it may be best to review the module and resources again.

**1** Multiple Choice 1 point

Which is not a sphere of the environment?

- ☐ Biosphere
- ☐ Lithosphere
- ☐ Hydrosphere
- ☒ MetaspHERE

**2** Multiple Choice 1 point

What is a renewable resource?

- ☒ A resource that can continuously be renewed.
- ☐ A resource that has a finite supply and can be depleted

**3** True or False 1 point

Cyclic Resources can be used continuously with no end

- ☒ True
- ☐ False

**4** Multiple Choice 1 point

How many centimeters (cm) are in one inch?

- ☐ 3
- ☐ 254
- ☐ .254
- ☒ 2.54

**5** Essay 1 point

What about environmental science is the most interesting to you?

⌵

Figure S2. Knowledge Check 2 (with correct answers)

4/11/22, 7:25 PM Knowledge Check 2

### Knowledge Check 2

Add Instructions...

**1** Multiple Choice 1 point

No place on Earth is colder today than it was 100 years ago.

☒ True

☐ False

**2** Multiple Choice 1 point

As average global temperature rises,

☒ Average precipitation increases

☐ Average precipitation decreases

**3** True or False 1 point

Wasting less food is a way to reduce greenhouse gas emissions.

☒ True

☐ False

**4** Multiple Answer 1 point

Which country is the world's largest emitter of carbon dioxide?

☐ U.S.

☒ China

☐ India

☐ Russia

**5** Essay 1 point

What's the difference between climate change and global warming?

0 words

Figure S3. Knowledge Check 3 (with correct answers)

4/11/22, 7:26 PM

Knowledge Check 3

### Knowledge Check 3

This will not count towards your final grade. Feel free to reference the previous module and resources.

1

Multiple Choice 1 point

What is cold stress?

☐ When you are afraid to live somewhere with colder temperatures

☒ When the temperature of the skin and body start dropping due to cold weather

☐ Stress you get when you have a cold

2

Multiple Choice 1 point

What is heat stress?

☒ When the body undergoes stress from over heating

☐ Being afraid you'll sweat through your t-shirt

☐ Not wearing enough protective clothing

3

True or False 1 point

Not drinking water is the best way to cure a heat related illness

☐ True

☒ False

4

True or False 1 point

Climate change and extreme weather events are not related.

☐ True

☒ False

5

Essay 1 point

Explain, in your own words, how you think climate change is/is not related to extreme weather events.

Figure S4. Knowledge Check 4 (with correct answers)

4/11/22, 7:27 PM

Knowledge Check 4

### Knowledge Check 4

Feel free to go back to the module or references to answer.

1

Multiple Choice 1 point

What is maximum sustainable yield?

☐ How much you need to take to deplete a resource

☐ Outdated type of farming

☒ The optimum level of growth so to not deplete the resource

☐ How much food humans can eat

2

True or False 1 point

The NJ Department of Education believes we need to use up all of our natural resources

☐ True

☒ False

3

Multiple Answer 1 point

What is NOT a sustainable practice?

☐ Recycling

☒ Buying

☐ Reusing

☐ Reducing

4

True or False 1 point

Energy efficiency is one key to reducing climate change risk

☒ True

☐ False

5

Essay 1 point

What does sustainability mean?

0 words

Figure S5. Knowledge Check 5 (with correct answers)

4/11/22, 7:27 PM

Knowledge Check 5

### Knowledge Check 5

Answer to the best of your abilities and feel free to reference the previous module and references.

1

Multiple Choice 1 point

What is environmental justice?

☐ Giving more resources to the rich

☒ Understanding the links between environmental health and lower income areas so to prevent any further injustices from happening.

☐ Only lawsuits about the environment

☐ Following the migration patterns of animals as a result of climate change.

2

True or False 1 point

Redlining pushed lower income communities into more dangerous and unhealthy areas.

☒ True

☐ False

3

Multiple Choice 1 point

Which is one of the 17 principles of Environmental Justice?

☐ Preserve the planet

☐ Ethical land use

☐ Fundamental right to clean air, food, water, etc.

☒ All of the above

4

True or False 1 point

New Jersey is the first state to deny permits if it could cause an environmental justice issue.

☒ True

☐ False

5

Essay 1 point

What can you do in your own life to prevent future environmental justice issues?

**Table S1.** Cross-tabulation analyses of three questions within a 20-question survey (see Tables 1 and 5) specific to environmental justice (EJ) in the United States (U.S.) as answered by participating New Jersey high school students in winter 2022.

|                                                           |              | Question 10: Student characterized EJ:<br>...in the U.S. was “very strong.”                        |            |
|-----------------------------------------------------------|--------------|----------------------------------------------------------------------------------------------------|------------|
|                                                           |              | Yes                                                                                                | No         |
| Question 9 on student’s self-reported familiarity with EJ | Familiar     | 6 (8.3%)                                                                                           | 53 (73.6%) |
|                                                           | Not Familiar | 2 (2.8%)                                                                                           | 11 (15.3%) |
|                                                           |              | ... in the U.S was “generally good.”                                                               |            |
|                                                           |              | Yes                                                                                                | No         |
| Question 9 on student’s self-reported familiarity with EJ | Familiar     | 22 (30.6%)                                                                                         | 37 (51.4%) |
|                                                           | Not Familiar | 4 (5.6%)                                                                                           | 9 (12.5%)  |
|                                                           |              | ... in the U.S “could use improvement.”                                                            |            |
|                                                           |              | Yes                                                                                                | No         |
| Question 9 on student’s self-reported familiarity with EJ | Familiar     | 29 (40.3%)                                                                                         | 30 (41.7%) |
|                                                           | Not Familiar | 9 (12.5%)                                                                                          | 4 (5.6%)   |
|                                                           |              | ... in the U.S was “extremely inequitable.”                                                        |            |
|                                                           |              | Yes                                                                                                | No         |
| Question 9 on student’s self-reported familiarity with EJ | Familiar     | 4 (5.6%)                                                                                           | 55 (76.4%) |
|                                                           | Not Familiar | 0 (0%)                                                                                             | 13 (18.1%) |
|                                                           |              | Question 19 on if student believed EJ is a part of conserving our environment or a separate issue? |            |
|                                                           |              | Yes                                                                                                | No         |
| Question 9 on student’s self-reported familiarity with EJ | Familiar     | 39 (54.2%)                                                                                         | 19 (26.4%) |
|                                                           | Not Familiar | 4 (5.6%)                                                                                           | 9 (12.5%)  |

Note: One student answered "yes" or "familiar" to question #9 but "no" to question 10 and "both" to question 19.

Note: For questions #9 and #19, N=72, due to missing data on four students.

Note: Percentages may add to 99.9% or 100.1% due to rounding.

**Table S2.** Three-way cross-tabulation analyses of questions (Q) within a 20-question survey (see Tables 1 and 5) specific to environmental justice (EJ) in the United States (U.S.) as answered by New Jersey high school students in winter 2022.

Note: One student answered "yes" or "familiar" to Q#9 but "no" to Q#10 and "both" to Q#19.

|                                                           |              | Question 19 on if student believed EJ is a part of conserving our environment or a separate issue? |            |            |            |
|-----------------------------------------------------------|--------------|----------------------------------------------------------------------------------------------------|------------|------------|------------|
|                                                           |              | Yes                                                                                                |            | No         |            |
|                                                           |              | Question 10: Student characterized EJ in the U.S. was “very strong.”                               |            |            |            |
|                                                           |              | Yes                                                                                                | No         | Yes        | No         |
| Question 9 on student’s self-reported familiarity with EJ | Familiar     | 5 (6.9%)                                                                                           | 34 (47.0%) | 1 (1.4%)   | 18 (25.0%) |
|                                                           | Not Familiar | 0 (0%)                                                                                             | 4 (5.6%)   | 2 (2.8%)   | 7 (9.7%)   |
|                                                           |              | Question 19 on if student believed EJ is a part of conserving our environment or a separate issue? |            |            |            |
|                                                           |              | Yes                                                                                                |            | Yes        |            |
|                                                           |              | Question 10: Student characterized EJ in the U.S. “could use improvement.”                         |            |            |            |
|                                                           |              | Yes                                                                                                | No         | Yes        | No         |
| Question 9 on student’s self-reported familiarity with EJ | Familiar     | 14 (19.4%)                                                                                         | 25 (34.7%) | 7 (9.7%)   | 12 (16.7%) |
|                                                           | Not Familiar | 1 (1.4%)                                                                                           | 3 (4.2%)   | 3 (4.2%)   | 6 (8.3%)   |
|                                                           |              | Question 19 on if student believed EJ is a part of conserving our environment or a separate issue? |            |            |            |
|                                                           |              | Yes                                                                                                |            | Yes        |            |
|                                                           |              | Question 10: Student characterized EJ in the U.S. was “generally good.”                            |            |            |            |
|                                                           |              | Yes                                                                                                | No         | Yes        | No         |
| Question 9 on student’s self-reported familiarity with EJ | Familiar     | 18 (25.0%)                                                                                         | 21 (29.2%) | 11 (15.3%) | 8 (11.1%)  |
|                                                           | Not Familiar | 4 (5.6%)                                                                                           | 0 (0%)     | 5 (6.9%)   | 4 (5.6%)   |
|                                                           |              | Question 19 on if student believed EJ is a part of conserving our environment or a separate issue? |            |            |            |
|                                                           |              | Yes                                                                                                |            | Yes        |            |
|                                                           |              | Question 10: Student characterized EJ in the U.S. was “extremely inequitable.”                     |            |            |            |
|                                                           |              | Yes                                                                                                | No         | Yes        | No         |
| Question 9 on student’s self-reported familiarity with EJ | Familiar     | 3 (4.2%)                                                                                           | 36 (50%)   | 1 (1.4%)   | 18 (25.0%) |
|                                                           | Not Familiar | 0 (0%)                                                                                             | 4 (5.6%)   | 0 (0%)     | 9 (12.5%)  |
